# Supplementary material for: Gene losses and partial deletion of small single-copy regions of the chloroplast genomes of two hemiparasitic Taxillus species
Source: PubMed Central journal article supplement (PMC5638910; doi:10.1038/s41598-017-13401-4), 2017-10-12
Supplement: 41598_2017_13401_MOESM1_ESM.pdf [file 41598_2017_13401_MOESM1_ESM.pdf]

# Gene losses and partial deletion of small single-copy regions of the chloroplast genomes of two hemiparasitic *Taxillus* species

Ying Li<sup>1+</sup>, Jian-guo Zhou<sup>1+</sup>, Xin-lian Chen<sup>1</sup>, Ying-xian Cui<sup>1</sup>, Zhi-chao Xu<sup>1</sup>, Yong-hua Li<sup>2</sup>, Jing-yuan Song<sup>1</sup>, Bao-zhong Duan<sup>3</sup> and Hui Yao<sup>1\*</sup>

<sup>1</sup>The Key Laboratory of Bioactive Substances and Resources Utilization of Chinese Herbal Medicine, Ministry of Education, Institute of Medicinal Plant Development, Chinese Academy of Medical Sciences & Peking Union Medical College, Beijing, 100193, China.

<sup>2</sup>Department of Pharmacy, Guangxi Traditional Chinese Medicine University, Nanning, 530200, Guangxi, China.

<sup>3</sup>College of Pharmaceutical Science, Dali University, Dali, 671000, Yunnan, China.

\*Correspondence: [scauyaoh@sina.com](mailto:scauyaoh@sina.com); Tel: +86-10-57833194

<sup>+</sup>These authors contributed equally to this work.

## Supplementary Material:

Figure S1: Comparison between the chloroplast genomes of two *Taxillus* species using the software mVISTA;

Table S1: Gene contents within the chloroplast genomes of *T. chinensis* compared to other five species;

Table S2. Primer sequences at the verification of pseudogenes;

Table S3: Codon usage within the chloroplast genomes of *T. chinensis* and *T. sutchuenensis*;

Table S4: Simple sequence repeats (SSRs) within the *T. chinensis* chloroplast genome;

Table S5: Simple sequence repeats (SSRs) within the *T. sutchuenensis* chloroplast genome;

Table S6: Primer sequences at the discrepancies in assembly results obtained using Illumina and PacBio;

Table S7: Primer sequences at the boundaries between single copy and IR regions.



**Table S1.** Gene contents within the chloroplast genomes of *T. chinensis* compared to other five species.

| Genes        | <i>Nicotiana tabacum</i> | <i>Osyris alba</i> | <i>Schoepfia jasminodora</i> | <i>Taxillus chinensis</i> | <i>Viscum minimum</i> | <i>Epifagus virginiana</i> |
|--------------|--------------------------|--------------------|------------------------------|---------------------------|-----------------------|----------------------------|
| <i>accD</i>  | +                        | +                  | +                            | +                         | +                     | +                          |
| <i>atpA</i>  | +                        | +                  | +                            | +                         | +                     | Ψ                          |
| <i>atpB</i>  | +                        | +                  | +                            | +                         | +                     | Ψ                          |
| <i>atpE</i>  | +                        | +                  | +                            | +                         | +                     | -                          |
| <i>atpF</i>  | +                        | +                  | +                            | +                         | +                     | -                          |
| <i>atpH</i>  | +                        | +                  | +                            | +                         | +                     | -                          |
| <i>atpI</i>  | +                        | +                  | +                            | +                         | +                     | -                          |
| <i>ccsA</i>  | -                        | +                  | +                            | +                         | +                     | -                          |
| <i>cemA</i>  | -                        | +                  | +                            | +                         | +                     | -                          |
| <i>clpP</i>  | +                        | +                  | +                            | +                         | +                     | +                          |
| <i>infA</i>  | Ψ                        | Ψ                  | +                            | -                         | -                     | +                          |
| <i>matK</i>  | +                        | +                  | +                            | +                         | +                     | +                          |
| <i>ndhA</i>  | +                        | Ψ                  | Ψ                            | -                         | -                     | -                          |
| <i>ndhB</i>  | +                        | Ψ                  | -                            | -                         | Ψ                     | Ψ                          |
| <i>ndhC</i>  | +                        | Ψ                  | -                            | -                         | -                     | -                          |
| <i>ndhD</i>  | +                        | Ψ                  | -                            | -                         | -                     | -                          |
| <i>ndhE</i>  | +                        | Ψ                  | -                            | -                         | -                     | -                          |
| <i>ndhF</i>  | +                        | -                  | -                            | -                         | -                     | -                          |
| <i>ndhG</i>  | +                        | Ψ                  | -                            | -                         | -                     | -                          |
| <i>ndhH</i>  | +                        | Ψ                  | -                            | -                         | -                     | -                          |
| <i>ndhI</i>  | +                        | -                  | -                            | -                         | -                     | -                          |
| <i>ndhJ</i>  | +                        | -                  | -                            | -                         | -                     | -                          |
| <i>ndhK</i>  | +                        | Ψ                  | -                            | -                         | -                     | -                          |
| <i>petA</i>  | +                        | +                  | +                            | +                         | +                     | -                          |
| <i>petB</i>  | +                        | +                  | +                            | +                         | +                     | -                          |
| <i>petD</i>  | +                        | +                  | +                            | +                         | +                     | -                          |
| <i>petG</i>  | +                        | +                  | +                            | +                         | +                     | -                          |
| <i>petL</i>  | +                        | +                  | +                            | +                         | +                     | -                          |
| <i>petN</i>  | -                        | +                  | +                            | +                         | +                     | -                          |
| <i>psaA</i>  | +                        | +                  | +                            | +                         | +                     | -                          |
| <i>psaB</i>  | +                        | +                  | +                            | +                         | +                     | -                          |
| <i>psaC</i>  | +                        | +                  | +                            | +                         | +                     | -                          |
| <i>psaI</i>  | +                        | +                  | +                            | +                         | +                     | -                          |
| <i>psaJ</i>  | +                        | +                  | +                            | +                         | +                     | -                          |
| <i>psbA</i>  | +                        | +                  | +                            | +                         | +                     | Ψ                          |
| <i>psbB</i>  | +                        | +                  | +                            | +                         | +                     | Ψ                          |
| <i>psbC</i>  | +                        | +                  | +                            | +                         | +                     | -                          |
| <i>psbD</i>  | +                        | +                  | +                            | +                         | +                     | -                          |
| <i>psbE</i>  | +                        | +                  | +                            | +                         | +                     | -                          |
| <i>psbF</i>  | +                        | +                  | +                            | +                         | +                     | -                          |
| <i>psbH</i>  | +                        | +                  | +                            | +                         | +                     | -                          |
| <i>psbI</i>  | +                        | +                  | +                            | +                         | +                     | -                          |
| <i>psbJ</i>  | +                        | +                  | +                            | +                         | +                     | -                          |
| <i>psbK</i>  | +                        | +                  | +                            | +                         | +                     | -                          |
| <i>psbL</i>  | +                        | +                  | +                            | +                         | +                     | -                          |
| <i>psbM</i>  | +                        | +                  | +                            | +                         | +                     | -                          |
| <i>psbN</i>  | +                        | +                  | +                            | +                         | +                     | -                          |
| <i>psbT</i>  | +                        | +                  | +                            | +                         | +                     | -                          |
| <i>psbZ</i>  | -                        | +                  | +                            | +                         | +                     | -                          |
| <i>rbcL</i>  | +                        | +                  | +                            | +                         | +                     | Ψ                          |
| <i>rp132</i> | +                        | -                  | -                            | -                         | -                     | -                          |
| <i>rpl12</i> | -                        | -                  | -                            | -                         | -                     | +                          |
| <i>rpl14</i> | +                        | +                  | +                            | +                         | +                     | Ψ                          |
| <i>rpl16</i> | +                        | +                  | +                            | Ψ                         | +                     | +                          |
| <i>rpl2</i>  | +                        | +                  | +                            | +                         | +                     | +                          |
| <i>rpl20</i> | +                        | +                  | +                            | +                         | +                     | +                          |
| <i>rpl22</i> | +                        | +                  | +                            | +                         | +                     | -                          |
| <i>rpl23</i> | +                        | +                  | +                            | +                         | +                     | Ψ                          |
| <i>rpl32</i> | -                        | +                  | +                            | -                         | +                     | -                          |

|                 |   |   |   |   |   |   |
|-----------------|---|---|---|---|---|---|
| <i>rpl33</i>    | + | + | + | + | - | + |
| <i>rpl36</i>    | + | + | + | + | + | + |
| <i>rpoA</i>     | + | + | + | + | + | Ψ |
| <i>rpoB</i>     | + | + | + | + | + | - |
| <i>rpoC1</i>    | + | + | + | + | + | - |
| <i>rpoC2</i>    | + | + | + | + | + | - |
| <i>rps11</i>    | + | + | + | + | + | + |
| <i>rps12</i>    | + | + | + | + | + | + |
| <i>rps14</i>    | + | + | + | + | + | + |
| <i>rps15</i>    | + | + | + | - | + | - |
| <i>rps16</i>    | + | + | + | - | + | - |
| <i>rps18</i>    | + | + | + | + | + | + |
| <i>rps19</i>    | + | + | + | + | + | + |
| <i>rps2</i>     | + | + | + | + | + | + |
| <i>rps3</i>     | + | + | + | + | + | + |
| <i>rps4</i>     | + | + | + | + | + | + |
| <i>rps7</i>     | + | + | + | + | + | + |
| <i>rps8</i>     | + | + | + | + | + | + |
| <i>rrn16S</i>   | + | + | + | + | + | + |
| <i>rrn23S</i>   | + | + | + | + | + | + |
| <i>rrn4.5S</i>  | + | + | + | + | + | + |
| <i>rrn5S</i>    | + | + | + | + | + | + |
| <i>trnA-UGC</i> | + | + | + | - | + | + |
| <i>trnC-GCA</i> | + | + | + | + | + | Ψ |
| <i>trnD-GUC</i> | + | + | + | + | + | + |
| <i>trnE-UUC</i> | + | + | + | + | + | + |
| <i>trnF-GAA</i> | + | + | + | + | + | + |
| <i>trnM-CAU</i> | + | + | + | + | + | - |
| <i>trnG-GCC</i> | + | + | - | + | + | - |
| <i>trnG-UCC</i> | + | + | + | - | + | - |
| <i>trnH-GUG</i> | + | + | + | - | + | + |
| <i>trnI-CAU</i> | - | - | + | + | - | + |
| <i>trnI-GAU</i> | + | + | + | - | + | + |
| <i>trnK-UUU</i> | + | + | + | - | + | - |
| <i>trnL-CAA</i> | + | + | Ψ | + | + | + |
| <i>trnL-UAA</i> | + | + | + | - | + | - |
| <i>trnL-UAG</i> | + | + | + | + | + | + |
| <i>trnM-CAU</i> | + | + | + | + | + | + |
| <i>trnN-GUU</i> | + | + | + | + | + | + |
| <i>trnP-UGG</i> | + | + | - | + | + | + |
| <i>trnQ-UUG</i> | + | + | + | + | + | + |
| <i>trnR-ACG</i> | + | + | + | + | + | + |
| <i>trnR-UCU</i> | + | + | + | + | + | Ψ |
| <i>trnS-GCU</i> | + | + | + | + | + | + |
| <i>trnS-GGA</i> | + | + | + | + | + | Ψ |
| <i>trnS-UGA</i> | + | + | + | + | + | + |
| <i>trnT-GGU</i> | + | + | + | + | + | - |
| <i>trnT-UGU</i> | + | + | + | + | + | - |
| <i>trnV-GAC</i> | + | + | + | + | + | - |
| <i>trnV-UAC</i> | + | - | - | - | - | - |
| <i>trnW-CCA</i> | + | + | + | + | + | + |
| <i>trnY-GUA</i> | + | + | + | + | + | + |
| <i>yef1</i>     | + | + | + | - | - | - |
| <i>yef2</i>     | + | + | + | + | + | + |
| <i>yef3</i>     | + | + | + | + | + | - |
| <i>yef4</i>     | + | + | + | + | + | - |
| <i>yef5</i>     | + | - | - | - | - | - |
| <i>yef9</i>     | + | - | - | - | - | - |
| <i>yef10</i>    | + | - | - | - | - | - |
| <i>yef15</i>    | + | + | Ψ | Ψ | - | - |

Abbreviations: +, present; -, missing; Ψ, pseudogene

**Table S2. Primer sequences at the verification of pseudogenes.**

| <b>Gene</b>  | <b>Forward/Reverse</b> | <b>Primer sequence (5' to 3')</b> |
|--------------|------------------------|-----------------------------------|
| <i>rpl16</i> | F                      | AGGGCATATTGGGCATTGCG              |
|              | R                      | ATTCGCCCGCGAAAGTTTTT              |
| <i>ycf15</i> | F                      | TCGACAGAGATGGCTTAGAACC            |
|              | R                      | TAACCCAGCAAGAAGCAGGG              |
| <i>rpl2</i>  | F                      | TAAGCCAGATGACGGAACGG              |
|              | R                      | TTTTAGCGGCTTGGCCTGTA              |

**Table S3. Codon usage within the chloroplast genomes of *T. chinensis* and *T. sutchuenensis*.**

| Amino acid | Codon | No. |     | RSCU |      | Amino acid | Codon | No. |     | RSCU |      |
|------------|-------|-----|-----|------|------|------------|-------|-----|-----|------|------|
|            |       | ①*  | ②*  | ①*   | ②*   |            |       | ①*  | ②*  | ①*   | ②*   |
| Phe        | TTT   | 676 | 685 | 1.36 | 1.38 | Tyr        | TAT   | 494 | 498 | 1.59 | 1.62 |
|            | TTC   | 318 | 308 | 0.64 | 0.62 |            | TAC   | 127 | 117 | 0.41 | 0.38 |
| Leu        | TTA   | 596 | 603 | 2.09 | 2.12 | Stop       | TAA   | 48  | 38  | 1.41 | 1.84 |
|            | TTG   | 363 | 355 | 1.27 | 1.25 |            | TAG   | 26  | 11  | 0.76 | 0.53 |
|            | CTT   | 341 | 330 | 1.20 | 1.16 |            | TGA   | 28  | 13  | 0.82 | 0.63 |
|            | CTC   | 104 | 104 | 0.36 | 0.37 | Trp        | TGG   | 303 | 302 | 1.00 | 1.00 |
|            | CTA   | 207 | 205 | 0.73 | 0.72 | Gln        | CAA   | 470 | 466 | 1.49 | 1.49 |
|            | CTG   | 100 | 106 | 0.35 | 0.37 |            | CAG   | 159 | 158 | 0.51 | 0.51 |
| Ile        | ATT   | 716 | 730 | 1.48 | 1.50 | Asn        | AAT   | 609 | 619 | 1.51 | 1.52 |
|            | ATC   | 260 | 269 | 0.54 | 0.55 |            | AAC   | 198 | 197 | 0.49 | 0.48 |
|            | ATA   | 471 | 464 | 0.98 | 0.95 | Lys        | AAA   | 674 | 678 | 1.54 | 1.54 |
| Met        | ATG   | 386 | 375 | 1.00 | 1.00 |            | AAG   | 201 | 200 | 0.46 | 0.46 |
| Val        | GTT   | 378 | 386 | 1.55 | 1.58 | Asp        | GAT   | 516 | 533 | 1.57 | 1.58 |
|            | GTC   | 103 | 101 | 0.42 | 0.41 |            | GAC   | 140 | 142 | 0.43 | 0.42 |
|            | GTA   | 357 | 359 | 1.46 | 1.47 | Glu        | GAA   | 637 | 644 | 1.47 | 1.49 |
|            | GTG   | 137 | 134 | 0.56 | 0.55 |            | GAG   | 227 | 223 | 0.53 | 0.51 |
| Ser        | TCT   | 365 | 353 | 1.73 | 1.67 | Pro        | CCT   | 235 | 229 | 1.36 | 1.35 |
|            | TCC   | 183 | 190 | 0.87 | 0.90 |            | CCC   | 165 | 171 | 0.96 | 1.01 |
|            | TCA   | 235 | 237 | 1.11 | 1.12 |            | CCA   | 193 | 181 | 1.12 | 1.07 |
|            | TCG   | 129 | 131 | 0.61 | 0.62 |            | CCG   | 98  | 97  | 0.57 | 0.57 |
|            | AGT   | 270 | 278 | 1.28 | 1.32 | Arg        | CGT   | 216 | 234 | 1.28 | 1.36 |
|            | AGC   | 87  | 78  | 0.41 | 0.37 |            | CGC   | 65  | 62  | 0.39 | 0.36 |
| Cys        | TGT   | 133 | 131 | 1.39 | 1.40 |            | CGA   | 230 | 239 | 1.36 | 1.39 |
|            | TGC   | 58  | 56  | 0.61 | 0.60 |            | CGG   | 84  | 81  | 0.50 | 0.47 |
| Thr        | ACT   | 375 | 376 | 1.69 | 1.68 |            | AGA   | 294 | 297 | 1.74 | 1.73 |
|            | ACC   | 163 | 159 | 0.73 | 0.71 |            | AGG   | 122 | 116 | 0.72 | 0.68 |
|            | ACA   | 258 | 266 | 1.16 | 1.19 | His        | CAT   | 340 | 338 | 1.51 | 1.51 |
|            | ACG   | 92  | 92  | 0.41 | 0.41 |            | CAC   | 111 | 110 | 0.49 | 0.49 |
| Ala        | GCT   | 394 | 412 | 1.75 | 1.76 | Gly        | GGT   | 414 | 419 | 1.41 | 1.41 |
|            | GCC   | 153 | 163 | 0.68 | 0.70 |            | GGC   | 116 | 114 | 0.39 | 0.38 |
|            | GCA   | 243 | 248 | 1.08 | 1.06 |            | GGA   | 442 | 444 | 1.50 | 1.49 |
|            | GCG   | 112 | 111 | 0.50 | 0.48 |            | GGG   | 204 | 212 | 0.69 | 0.71 |

\* ①: *T. chinensis*; ②: *T. sutchuenensis*

**Table S4. Simple sequence repeats (SSRs) in *T. chinensis* chloroplast genome.**

| SSR type | Repeat motif | Size (bp) | Start  | End    | Region |
|----------|--------------|-----------|--------|--------|--------|
| p1       | (A)10        | 10        | 7215   | 7224   | LSC    |
| p1       | (A)10        | 10        | 51768  | 51777  | LSC    |
| p1       | (A)10        | 10        | 93998  | 94007  | SSC    |
| p1       | (A)11        | 11        | 3035   | 3045   | LSC    |
| p1       | (A)11        | 11        | 36782  | 36792  | LSC    |
| p1       | (A)12        | 12        | 76661  | 76672  | IRa    |
| p1       | (A)13        | 13        | 57250  | 57262  | LSC    |
| p1       | (A)14        | 14        | 98749  | 98762  | SSC    |
| p1       | (A)8         | 8         | 8442   | 8449   | LSC    |
| p1       | (A)8         | 8         | 17810  | 17817  | LSC    |
| p1       | (A)8         | 8         | 25843  | 25850  | LSC    |
| p1       | (A)8         | 8         | 29431  | 29438  | LSC    |
| p1       | (A)8         | 8         | 39660  | 39667  | LSC    |
| p1       | (A)8         | 8         | 50350  | 50357  | LSC    |
| p1       | (A)8         | 8         | 57551  | 57558  | LSC    |
| p1       | (A)8         | 8         | 90683  | 90690  | IRa    |
| p1       | (A)8         | 8         | 94784  | 94791  | SSC    |
| p1       | (A)8         | 8         | 95620  | 95627  | SSC    |
| p1       | (A)9         | 9         | 9125   | 9133   | LSC    |
| p1       | (A)9         | 9         | 17187  | 17195  | LSC    |
| p1       | (A)9         | 9         | 24284  | 24292  | LSC    |
| p1       | (A)9         | 9         | 35315  | 35323  | LSC    |
| p1       | (A)9         | 9         | 38374  | 38382  | LSC    |
| p1       | (A)9         | 9         | 46981  | 46989  | LSC    |
| p1       | (A)9         | 9         | 56658  | 56666  | LSC    |
| p1       | (A)9         | 9         | 58046  | 58054  | LSC    |
| p1       | (A)9         | 9         | 59596  | 59604  | LSC    |
| p1       | (A)9         | 9         | 94189  | 94197  | SSC    |
| p1       | (A)9         | 9         | 105569 | 105577 | IRb    |
| p1       | (C)10        | 10        | 55503  | 55512  | LSC    |
| p1       | (C)8         | 8         | 19968  | 19975  | LSC    |
| p1       | (C)8         | 8         | 43314  | 43321  | LSC    |
| p1       | (C)8         | 8         | 90129  | 90136  | IRa    |
| p1       | (G)8         | 8         | 101581 | 101588 | IRb    |
| p1       | (T)10        | 10        | 1602   | 1611   | LSC    |
| p1       | (T)10        | 10        | 4004   | 4013   | LSC    |
| p1       | (T)10        | 10        | 4778   | 4787   | LSC    |
| p1       | (T)10        | 10        | 13342  | 13351  | LSC    |
| p1       | (T)10        | 10        | 28650  | 28659  | LSC    |
| p1       | (T)10        | 10        | 37692  | 37701  | LSC    |
| p1       | (T)10        | 10        | 57048  | 57057  | LSC    |
| p1       | (T)10        | 10        | 61379  | 61388  | LSC    |

|    |       |    |        |        |     |
|----|-------|----|--------|--------|-----|
| p1 | (T)10 | 10 | 70346  | 70355  | LSC |
| p1 | (T)10 | 10 | 98108  | 98117  | SSC |
| p1 | (T)11 | 11 | 62990  | 63000  | LSC |
| p1 | (T)11 | 11 | 94971  | 94981  | SSC |
| p1 | (T)12 | 12 | 115045 | 115056 | IRb |
| p1 | (T)14 | 14 | 8840   | 8853   | LSC |
| p1 | (T)8  | 8  | 2037   | 2044   | LSC |
| p1 | (T)8  | 8  | 9486   | 9493   | LSC |
| p1 | (T)8  | 8  | 11434  | 11441  | LSC |
| p1 | (T)8  | 8  | 48465  | 48472  | LSC |
| p1 | (T)8  | 8  | 51553  | 51560  | LSC |
| p1 | (T)8  | 8  | 55182  | 55189  | LSC |
| p1 | (T)8  | 8  | 59449  | 59456  | LSC |
| p1 | (T)8  | 8  | 65790  | 65797  | LSC |
| p1 | (T)8  | 8  | 68047  | 68054  | LSC |
| p1 | (T)8  | 8  | 69243  | 69250  | LSC |
| p1 | (T)8  | 8  | 94631  | 94638  | SSC |
| p1 | (T)8  | 8  | 95839  | 95846  | SSC |
| p1 | (T)8  | 8  | 101027 | 101034 | IRb |
| p1 | (T)9  | 9  | 68     | 76     | LSC |
| p1 | (T)9  | 9  | 3526   | 3534   | LSC |
| p1 | (T)9  | 9  | 10362  | 10370  | LSC |
| p1 | (T)9  | 9  | 13202  | 13210  | LSC |
| p1 | (T)9  | 9  | 20333  | 20341  | LSC |
| p1 | (T)9  | 9  | 35178  | 35186  | LSC |
| p1 | (T)9  | 9  | 35513  | 35521  | LSC |
| p1 | (T)9  | 9  | 36422  | 36430  | LSC |
| p1 | (T)9  | 9  | 37560  | 37568  | LSC |
| p1 | (T)9  | 9  | 55855  | 55863  | LSC |
| p1 | (T)9  | 9  | 57829  | 57837  | LSC |
| p1 | (T)9  | 9  | 61126  | 61134  | LSC |
| p1 | (T)9  | 9  | 69064  | 69072  | LSC |
| p1 | (T)9  | 9  | 86140  | 86148  | IRa |
| p2 | (AG)4 | 8  | 102712 | 102719 | IRb |
| p2 | (AT)4 | 8  | 25647  | 25654  | LSC |
| p2 | (AT)4 | 8  | 40716  | 40723  | LSC |
| p2 | (AT)4 | 8  | 43446  | 43453  | LSC |
| p2 | (AT)4 | 8  | 49990  | 49997  | LSC |
| p2 | (AT)4 | 8  | 66094  | 66101  | LSC |
| p2 | (AT)5 | 10 | 38043  | 38052  | LSC |
| p2 | (AT)5 | 10 | 52685  | 52694  | LSC |
| p2 | (AT)5 | 10 | 69603  | 69612  | LSC |
| p2 | (AT)5 | 10 | 111658 | 111667 | IRb |
| p2 | (CA)4 | 8  | 108032 | 108039 | IRb |



|    |         |    |        |        |     |
|----|---------|----|--------|--------|-----|
| p2 | (CT)4   | 8  | 18379  | 18386  | LSC |
| p2 | (CT)4   | 8  | 49096  | 49103  | LSC |
| p2 | (CT)4   | 8  | 88998  | 89005  | IRa |
| p2 | (GA)4   | 8  | 44277  | 44284  | LSC |
| p2 | (GA)4   | 8  | 72281  | 72288  | IRa |
| p2 | (GA)4   | 8  | 105094 | 105101 | IRb |
| p2 | (TA)4   | 8  | 1396   | 1403   | LSC |
| p2 | (TA)4   | 8  | 14725  | 14732  | LSC |
| p2 | (TA)4   | 8  | 39233  | 39240  | LSC |
| p2 | (TA)4   | 8  | 39829  | 39836  | LSC |
| p2 | (TA)4   | 8  | 72506  | 72513  | IRa |
| p2 | (TA)4   | 8  | 91116  | 91123  | IRa |
| p2 | (TA)4   | 8  | 100594 | 100601 | IRb |
| p2 | (TA)4   | 8  | 119204 | 119211 | IRb |
| p2 | (TA)5   | 10 | 80049  | 80058  | IRa |
| p2 | (TC)4   | 8  | 67559  | 67566  | LSC |
| p2 | (TC)4   | 8  | 86616  | 86623  | IRa |
| p2 | (TC)4   | 8  | 119429 | 119436 | IRb |
| p2 | (TG)4   | 8  | 45510  | 45517  | LSC |
| p2 | (TG)4   | 8  | 83678  | 83685  | IRa |
| p3 | (AAG)4  | 12 | 83225  | 83236  | IRa |
| p3 | (CTT)4  | 12 | 108481 | 108492 | IRb |
| p4 | (ACA)3  | 12 | 68524  | 68535  | LSC |
| p4 | (GTCT)3 | 12 | 6664   | 6675   | LSC |

**Table S5. Simple sequence repeats (SSRs) in *T. sutchuenensis* chloroplast genome.**

| SSR type | Repeat motif | Size (bp) | Start  | End    | Region |
|----------|--------------|-----------|--------|--------|--------|
| p1       | (A)10        | 10        | 29043  | 29052  | LSC    |
| p1       | (A)10        | 10        | 50942  | 50951  | LSC    |
| p1       | (A)10        | 10        | 51727  | 51736  | LSC    |
| p1       | (A)11        | 11        | 39352  | 39362  | LSC    |
| p1       | (A)12        | 12        | 76919  | 76930  | IRa    |
| p1       | (A)13        | 13        | 24237  | 24249  | LSC    |
| p1       | (A)13        | 13        | 57202  | 57214  | LSC    |
| p1       | (A)14        | 14        | 99497  | 99510  | SSC    |
| p1       | (A)8         | 8         | 3070   | 3077   | LSC    |
| p1       | (A)8         | 8         | 3637   | 3644   | LSC    |
| p1       | (A)8         | 8         | 7103   | 7110   | LSC    |
| p1       | (A)8         | 8         | 8334   | 8341   | LSC    |
| p1       | (A)8         | 8         | 17728  | 17735  | LSC    |
| p1       | (A)8         | 8         | 36823  | 36830  | LSC    |
| p1       | (A)8         | 8         | 39773  | 39780  | LSC    |
| p1       | (A)8         | 8         | 50384  | 50391  | LSC    |
| p1       | (A)8         | 8         | 80902  | 80909  | IRa    |
| p1       | (A)8         | 8         | 93344  | 93351  | IRa    |
| p1       | (A)8         | 8         | 94729  | 94736  | SSC    |
| p1       | (A)8         | 8         | 95556  | 95563  | SSC    |
| p1       | (A)8         | 8         | 96422  | 96429  | SSC    |
| p1       | (A)8         | 8         | 106441 | 106448 | IRb    |
| p1       | (A)9         | 9         | 4097   | 4105   | LSC    |
| p1       | (A)9         | 9         | 17102  | 17110  | LSC    |
| p1       | (A)9         | 9         | 25700  | 25708  | LSC    |
| p1       | (A)9         | 9         | 39537  | 39545  | LSC    |
| p1       | (A)9         | 9         | 47020  | 47028  | LSC    |
| p1       | (A)9         | 9         | 58292  | 58300  | LSC    |
| p1       | (A)9         | 9         | 59499  | 59507  | LSC    |
| p1       | (C)8         | 8         | 19881  | 19888  | LSC    |
| p1       | (G)8         | 8         | 45019  | 45026  | LSC    |
| p1       | (T)10        | 10        | 3325   | 3334   | LSC    |
| p1       | (T)10        | 10        | 9199   | 9208   | LSC    |
| p1       | (T)10        | 10        | 9391   | 9400   | LSC    |
| p1       | (T)10        | 10        | 13299  | 13308  | LSC    |
| p1       | (T)10        | 10        | 61700  | 61709  | LSC    |
| p1       | (T)11        | 11        | 47327  | 47337  | LSC    |
| p1       | (T)11        | 11        | 95743  | 95753  | SSC    |
| p1       | (T)12        | 12        | 56427  | 56438  | LSC    |
| p1       | (T)12        | 12        | 116263 | 116274 | IRb    |
| p1       | (T)8         | 8         | 8761   | 8768   | LSC    |

|    |       |    |        |        |     |
|----|-------|----|--------|--------|-----|
| p1 | (T)8  | 8  | 11387  | 11394  | LSC |
| p1 | (T)8  | 8  | 29750  | 29757  | LSC |
| p1 | (T)8  | 8  | 35175  | 35182  | LSC |
| p1 | (T)8  | 8  | 38367  | 38374  | LSC |
| p1 | (T)8  | 8  | 48507  | 48514  | LSC |
| p1 | (T)8  | 8  | 55109  | 55116  | LSC |
| p1 | (T)8  | 8  | 57002  | 57009  | LSC |
| p1 | (T)8  | 8  | 59352  | 59359  | LSC |
| p1 | (T)8  | 8  | 63370  | 63377  | LSC |
| p1 | (T)8  | 8  | 69498  | 69505  | LSC |
| p1 | (T)8  | 8  | 86745  | 86752  | IRa |
| p1 | (T)8  | 8  | 99842  | 99849  | IRb |
| p1 | (T)8  | 8  | 112284 | 112291 | IRb |
| p1 | (T)9  | 9  | 1647   | 1655   | LSC |
| p1 | (T)9  | 9  | 2072   | 2080   | LSC |
| p1 | (T)9  | 9  | 7566   | 7574   | LSC |
| p1 | (T)9  | 9  | 13155  | 13163  | LSC |
| p1 | (T)9  | 9  | 20246  | 20254  | LSC |
| p1 | (T)9  | 9  | 21922  | 21930  | LSC |
| p1 | (T)9  | 9  | 29172  | 29180  | LSC |
| p1 | (T)9  | 9  | 35533  | 35541  | LSC |
| p1 | (T)9  | 9  | 48906  | 48914  | LSC |
| p1 | (T)9  | 9  | 57753  | 57761  | LSC |
| p1 | (T)9  | 9  | 61035  | 61043  | LSC |
| p1 | (T)9  | 9  | 69319  | 69327  | LSC |
| p1 | (T)9  | 9  | 70457  | 70465  | LSC |
| p1 | (T)9  | 9  | 96631  | 96639  | SSC |
| p2 | (AG)4 | 8  | 103534 | 103541 | IRb |
| p2 | (AT)4 | 8  | 50024  | 50031  | LSC |
| p2 | (AT)7 | 14 | 37236  | 37249  | LSC |
| p2 | (CA)4 | 8  | 108848 | 108855 | IRb |
| p2 | (CT)4 | 8  | 18292  | 18299  | LSC |
| p2 | (CT)4 | 8  | 23153  | 23160  | LSC |
| p2 | (CT)4 | 8  | 89652  | 89659  | IRa |
| p2 | (GA)4 | 8  | 44284  | 44291  | LSC |
| p2 | (GA)4 | 8  | 72563  | 72570  | IRa |
| p2 | (GA)4 | 8  | 105953 | 105960 | IRb |
| p2 | (TA)4 | 8  | 1395   | 1402   | LSC |
| p2 | (TA)4 | 8  | 4461   | 4468   | LSC |
| p2 | (TA)4 | 8  | 14672  | 14679  | LSC |
| p2 | (TA)4 | 8  | 25864  | 25871  | LSC |
| p2 | (TA)4 | 8  | 36204  | 36211  | LSC |
| p2 | (TA)4 | 8  | 39156  | 39163  | LSC |
| p2 | (TA)4 | 8  | 70992  | 70999  | IRa |

|    |         |    |        |        |     |
|----|---------|----|--------|--------|-----|
| p2 | (TA)4   | 8  | 72788  | 72795  | IRa |
| p2 | (TA)4   | 8  | 91775  | 91782  | IRa |
| p2 | (TA)4   | 8  | 101411 | 101418 | IRb |
| p2 | (TA)4   | 8  | 120398 | 120405 | IRb |
| p2 | (TA)4   | 8  | 122194 | 122201 | IRb |
| p2 | (TA)5   | 10 | 53052  | 53061  | LSC |
| p2 | (TA)7   | 14 | 38006  | 38019  | LSC |
| p2 | (TC)4   | 8  | 87233  | 87240  | IRa |
| p2 | (TC)4   | 8  | 120623 | 120630 | IRb |
| p2 | (TG)4   | 8  | 45544  | 45551  | LSC |
| p2 | (TG)4   | 8  | 84338  | 84345  | IRa |
| p3 | (AAG)4  | 12 | 83889  | 83900  | IRa |
| p3 | (CTT)4  | 12 | 109293 | 109304 | IRb |
| p4 | (GTCT)3 | 12 | 6552   | 6563   | LSC |
| p4 | (TAAG)3 | 12 | 51172  | 51183  | LSC |

**Table S6. Primer sequences at the discrepancies in assembly results obtained using Illumina and PacBio.**

| No. | Sites (bp) | Forward/Reverse | Primer sequence (5'to 3') |
|-----|------------|-----------------|---------------------------|
| 1   | 4615       | F               | GTTTGGCAAGCCGCTCTAAG      |
|     |            | R               | ACCTATCCGGGCTGTATTGC      |
| 2   | 17326      | F               | GATCGGTCTTAGTTCGGGGG      |
|     |            | R               | ATCGCGTAGAGGCTTGAAGG      |
| 3   | 17952      | F               | CCCTTCGAATCATGAATCCGC     |
|     |            | R               | TGGGCTCGGTTTCTCCTCAA      |
| 4   | 27768      | F               | CTTGGTGGTCGGGAAATGC       |
|     |            | R               | TTGAGCGGATCCCACGTT        |
| 5   | 32700      | F               | CCACAGCCGATTGACCAAAA      |
|     |            | R               | CGTGTGATGGACCTGGAAGA      |
| 6   | 41040      | F               | TGGCACAGGATGATCAATTTGA    |
|     |            | R               | ATCACGCCCTATTGCTACA       |
| 7   | 45020      | F               | GCAGGTACATGCGAAGAAATG     |
|     |            | R               | GATCCAAGGCCCGAAACTAC      |
| 8   | 51046      | F               | GACCGGAACCTTGTTTCG        |
|     |            | R               | GTCTCTAGCAGGACCACTTGAT    |
| 9   | 55514      | F               | CTCCTCGAAAGCTTGCTGC       |
|     |            | R               | GGTGTATGTGCGACTCGTTC      |
| 10  | 58056      | F               | CTCCGGGTAAAGATCCGACC      |
|     |            | R               | TCAAAGGACCCGCCTATTTCG     |
| 11  | 87056      | F               | TCGGGGAGGATAAATCGCTC      |
|     |            | R               | TGTTTCAGTTCGCCAGGTTG      |
| 12  | 90138      | F               | CAAAGGCAGAAGGGAGCTTG      |
|     |            | R               | CTCTACGCCTAGGACACCAG      |
| 13  | 101590     | F               | CTCTACGCCTAGGACACCAG      |
|     |            | R               | CAAAGGCAGAAGGGAGCTTG      |
| 14  | 104671     | F               | TGTTTCAGTTCGCCAGGTTG      |
|     |            | R               | TCGGGGAGGATAAATCGCTC      |

**Table S7. Primer sequences at the boundaries between single copy and IR regions.**

| Species                       | Regions | Forward/Reverse | Primer sequence (5' to 3') |
|-------------------------------|---------|-----------------|----------------------------|
| <i>Taxillus chinensis</i>     | LSC-IRa | F               | GGTAGATGCTCGTGACCAAG       |
|                               |         | R               | ACATAAGCCAGATGACGGAAC      |
|                               | IRa-SSC | F               | GTTTCGATGCAACAACAAGATG     |
|                               |         | R               | GGAGAAACCCCATGAAAGGA       |
|                               | SSC-IRb | F               | CACCAAAAGATTGGTTCAATAAAGG  |
|                               |         | R               | TGTTTCGATGCAACAACAAGAT     |
|                               | IRb-LSC | F               | TAAGCCAGATGACGGAACGG       |
|                               |         | R               | TTTTAGCGGCTTGGCCTGTA       |
| <i>Taxillus sutchuenensis</i> | LSC-IRa | F               | AATGGTAGATGCTCGTGACC       |
|                               |         | R               | CATAAGCCAGATGACGGAACG      |
|                               | IRa-SSC | F               | GTTTCGATGCAACAACAAGATG     |
|                               |         | R               | GGAGAAACCCCATGAAAGGA       |
|                               | SSC-IRb | F               | AGGTTGGTTCAAGAAAGGATCA     |
|                               |         | R               | GTTTCGATGCAACAACAAGATG     |
|                               | IRb-LSC | F               | GGAACGGGAAGACCTAGGATG      |
|                               |         | R               | CGGCTTGGCCTGTAGTAGG        |
